# Supplementary material for: BMP-mediated inhibition of FGF signaling promotes cardiomyocyte differentiation of anterior heart field progenitors
Source: Oxford University Press journal article supplement (doi:10.1242/dev.051649), 2010-08-12
Supplement: dev051649tables1.pdf [file dev051649tables1.pdf]

**Table S1. Temporal expression profiles of genes that differ between control and BMP4-treated AHF cells**

| Cluster                                                         | Cluster 2    | Cluster 3     | Cluster 4 | Cluster 5     | Cluster 6     | Cluster 7     |
|-----------------------------------------------------------------|--------------|---------------|-----------|---------------|---------------|---------------|
| ATP5C1                                                          | NR2F2        | CAMK2A        | LOC421552 | GPC3          | MIB1          | LOC424271     |
| SLC10A4                                                         | C1QL3        | ALPI          | HKDC1     | AHNAK2        | AMN1          | BAPX1         |
| STMN2                                                           | TFAP2B       | KIF9          | TATDN1    | LOC417741     | PTPN14        | P20K          |
| NOG                                                             | SIX3         | UNC93A        | TAP1      | LOC417741     | RCJMB04_1a24  | FANCA         |
| FZD6                                                            | GSTO1        | EVPL          | ARHGAP1   | NR0B1         | LOC769727     | BLNK          |
| PADI1                                                           | LOC772356    | AGR2          | ZNF232    | LOC418200     | LIN54         | LOC425213     |
| WNT16                                                           | FCGBP        | FAM3B         | DMBT1     | MSX2          | XYLB          | LOC426312     |
| LOC422672                                                       | SLC39A8      | PDGFC         | LOC769120 | CSRP2         | RCJMB04_21a21 | SOCS2         |
| LOC422672                                                       | CCDC84       | ALPK3         | DPYS      | UPK1B         | RCJMB04_23i8  | COL14A1       |
| TOR1AIP1                                                        | ARSJ         | ADCY8         | PRRX1     | LOC418200     | SIL1          | XRCC3         |
| ANXA1                                                           | DLL1         | HOXB3         | MAP3K8    | VLDLR         | TXNDC10       | ASTL          |
| PAK1                                                            | CGNRH-I      | KLHL31        |           | WISP1         | UNG           | UPP1          |
| B3GALNT2                                                        | ARSJ         | SGMS1         |           | BMPER         | KIAA0319L     | CXCL14        |
| LOC421075                                                       | PAX6         | FGFR3         |           | SOX14         | LOC424668     | SOSTDC1       |
| LOC417056 ///<br>LOC417083 ///<br>LOC768350 ///<br>YFV /// YFVI | IQCE         | NAT1          |           | SGK           | EPB41L3       | CRABP1        |
| MRPS25                                                          | FGF12        | ADCY8         |           | UPK1B         | RCJMB04_2c16  | DLX1          |
| LOC422968                                                       | RCJMB04_30k7 | EMP1          |           | BLB1          | LOC425840     | CHGA          |
| AKR1D1                                                          | GSTA1        | RBM20         |           | AQP5          | LOC419755     | GSTA3         |
|                                                                 | PDLIM4       | RCJMB04_7i20  |           | BTG2          | MYO1B         | COL14A1       |
|                                                                 | TMTC4        | ALDH1A2       |           | PENK          | TMTC2         | STOM          |
|                                                                 | LOC416235    | BMP2          |           | KRT15         | OSBPL1A       | NXP1          |
|                                                                 | ITGB3        | LOC420209     |           | PLD5          | SLC25A1       | LPL           |
|                                                                 | DKK1         | PEX16         |           | PSCA          | RCJMB04_25a7  | ISLET-2       |
|                                                                 | LOC427336    | TNNT2         |           | TIMP3         | CDC5L         | RSPO3         |
|                                                                 | KIAA0430     | MYL4          |           | HTR1E         | B3GNTL1       | LOC423224     |
|                                                                 | LOC395159    | MAPK12        |           | LOC423451     | LOC428753     | PTPRZ1        |
|                                                                 | TRIM2        | SNAP25        |           | GSC           | LOC395452     | IL15          |
|                                                                 | CTTNBP2      | NINJ2         |           | FZ-8          | KCNB1         | PPP1R14C      |
|                                                                 | SFRS12       | ALDH1A2       |           | HS3ST2        | CADM2         | LOC769486     |
|                                                                 | HMGA2        | CHODL         |           | KRT14         | EGFL7         | ZPLD1         |
|                                                                 | MICAL3       | ASB2          |           | LOC769149     | SLC35F5       | NPY           |
|                                                                 | CEPU-SE      | GSN           |           | FIBIN         | RCJMB04_19i23 | LOC417756     |
|                                                                 | GPBP1L1      | KRT19         |           | RCJMB04_17o8  | ASRGL1        | HPSE2         |
|                                                                 | NKTR         | SOD3          |           | BETA3         | KLHDC2        | SPRY1         |
|                                                                 | LOC771055    | RCJMB04_32a22 |           | LOC772254     | PRKACB        | TMEM16A       |
|                                                                 | CREB3L2      | RCJMB04_2f9   |           | LOC769860     | LOC423782     | MMP9          |
|                                                                 | CCDC88C      | ST6GALNAC1    |           | LOC395378     | LOC417372     | CHD1          |
|                                                                 | CAMSAP1L1    | TNNI1         |           | RCJMB04_21i11 | SEC24D        | CYP27C1       |
|                                                                 | THSD7A       | SNTB1         |           | ERC1          | LOC421307     | RCJMB04_24e23 |
|                                                                 | TMTC4        | RCJMB04_2f9   |           | SMAD7         | NBEAL1        |               |
|                                                                 | ROCK2        | LOC772080     |           |               | LOC426312     |               |
|                                                                 | EPRS         | PRPS2         |           |               | PLOD1         |               |
|                                                                 | SRC          | PNOC          |           |               | FABP7         |               |
|                                                                 | GCHFR        | BLB2          |           |               | LOC770209     |               |
|                                                                 | TOP2A        | PLSCR1        |           |               |               |               |
|                                                                 | CDCA3        | RCJMB04_1a13  |           |               |               |               |
|                                                                 | BCLAF1       | SNAP25        |           |               |               |               |
|                                                                 | PHLDA2       | MYOM2         |           |               |               |               |
|                                                                 | LOC770004    | SCTR          |           |               |               |               |
|                                                                 | ASPM         | PTN           |           |               |               |               |

|               |                 |
|---------------|-----------------|
| GET           | PGC             |
| KCNAB1        | CHODL           |
| BIRC5         | SRL             |
| LOC417909     | MAT1A           |
| LOC395632     | NEXN            |
| JMJD1C        | BVES /// POPDC3 |
| SFRS12        | ATP6V1C2        |
| PITX1         | RCJMB04_5p23    |
| LOC424393     | MB              |
| IPO9          | LOC421019       |
| RCJMB04_1g20  | PRPS2           |
| AKAP8L        | FGFBP1          |
|               | CDH13 ///       |
| FST           | LOC776611       |
| SNRPG         | KRT15           |
| HIST1H1C      | KREMEN1         |
| ZFR           | NEXN            |
| LOC426827 /// |                 |
| LOC770038 /// |                 |
| LOC770065 /// |                 |
| LOC776772     | LOC421889       |
| MYH10         | FKBP1B          |
| SFRS2IP       | LOC772190       |
| EIF3A         | LOC772190       |
| LOC424393     | PRPS2           |
| LOC427941     | DUSP26          |
| AKAP12        | NEXN            |
| GATA3         | SMYD1           |
| LIN28B        | TPM1            |
| KIF4A         | RPL9            |
| LOC422838     | TH              |
| AQR           | TTN             |
| LOC431601     | CPM             |
| LIN28         | LOC425711       |
| SMC2          | VGLL1           |
| LOC416348     | PTN             |
| LOC418421     | MATN2           |
| CCDC88C       | ACTN2           |
| CENPH         | ANXA8L2         |
| FGB           | SSPN            |
| MIA3          | SLC25A4         |
| RPS25         | POPDC2          |
| LOC427846     | HHEX            |
| MLLT1         | NEBL            |
| LOC423325     | ATP2A2          |
| SLBP          | BIN1            |
| SOX3          | EPAS1           |
| GIN51         | APOBEC2         |
| CCND1         | TPM1            |
| NEDD9         | ADPRHL1         |
| LOC419240     | AHNAK2          |
| DACT2         | KBTBD10         |
| DACT2         | BAMBI           |
| BMPR1B        | TTN             |
| CYP26C1       | NEBL            |
| CCND1         | MATN2           |

|               |               |
|---------------|---------------|
| MCM2          | TTC8          |
| HES5          | IRX4          |
| VEGFA         | EEF1A2        |
| MYCN          | MYL3          |
| LOC419390     | ANXA8L2       |
| CYP26C1       | HTATIP2       |
| FGF3          | RG54          |
| PRR5          | LOC423610     |
| FGF3          | ADC           |
| AADA4L4       | PROX1         |
| PDGFA         | IRX4          |
| RCJMB04_35a17 | AHNAK2        |
| NPM3          | CD44          |
| PDGFA         | LAD1          |
| RCJMB04_1d13  | POPDC2        |
| IL17RD        | MYH7B         |
| EYA2          | LOC416033     |
| FGF18         | KERA          |
| MYCN          | ADD3          |
| FGF8          | UNC45B        |
| FSTL4         | CAP2          |
| FGF19         | SMYD1         |
| LGMN          | RG518         |
| RARB          | LOC429077     |
| RCJMB04_1f15  | ASB12         |
| FIGF          | OXCT1         |
| NPM3          | LECT1         |
| FOXC2         | MYBPC3        |
| CCDC109B      | LOC427259     |
| RELN          | LOC426853     |
| LOC769609     | LOC424460     |
| CA10          | CALD1         |
| LOC421390     | WNT3A         |
| PDLIM4        | RCJMB04_1c1   |
| CYTL1         | TRIM55        |
| LRIG3         | LOC770869     |
| WSCD2         | RCJMB04_7f20  |
| HOMER2        | RCJMB04_12d15 |
| GBX2          | BMP5          |
| DUSP4         | RCJMB04_2i21  |
| LOC418948     | HMGCLL1       |
| FZD8          | VCAM1         |
| SLITRK4       | LOC419204     |
| LOC422929     | LOC424271     |
| SLITRK4       | PTP4A1        |
| LOC770922     | WNT3A         |
| LOC426585     | LOC395524     |
| EPHB1         | SMPX          |
| RIF1          | SLC18A2       |
| RCJMB04_1i4   | WDR22         |
| HEY1          | PLA2G4A       |
| SLC18A3       | RCJMB04_37h11 |
| ETV4          | RCJMB04_2i21  |
| LOC771069     | LOC420768     |

|              |           |
|--------------|-----------|
| RPL10A       | ZDHHC16   |
| CPNE4        | CCDC125   |
| RCJMB04_28f9 | LRRC6     |
| BCAT1        | IVD       |
| LOC423952    | SLC25A1   |
| LOC772356    | TUBA1A    |
| RLX3         | LOC428141 |
| RCJMB04_4k14 | PRICKLE1  |
| SLC1A4       |           |
| IRF1         |           |

---
